# Supplementary material
Source: Springer Nature journal article supplement (https://www.springermedizin.de/resource/supplementary/13014_2013_945_MOESM4_ESM.pdf/9634486)

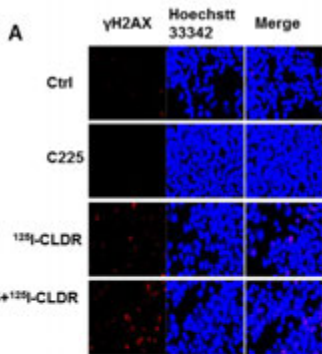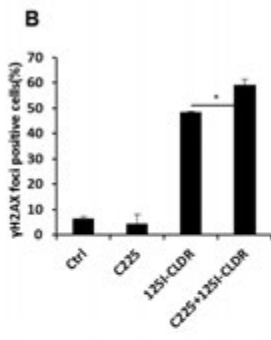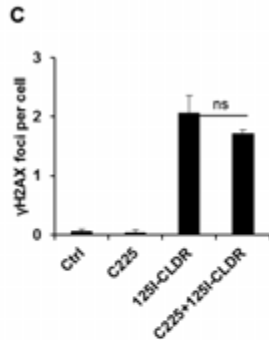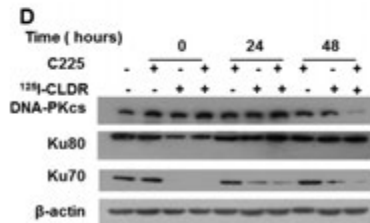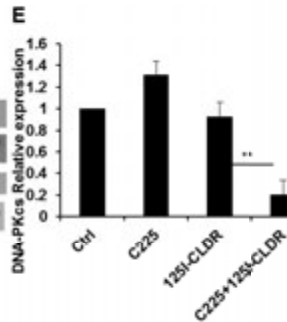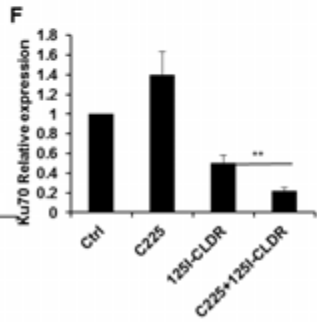

Supplement: MOESM4 [file 9634486]
